# Supplementary material for: In-Hospital Mortality in Patients with and without Dementia across Age Groups, Clinical Departments, and Primary Admission Diagnoses
Source: MDPI journal article supplement (doi:10.3390/brainsci14050455), 2024-04-30
Supplement: s1 [file s1]

**Supplementary Table S1:** Overview about diagnoses per group

| Main diagnosis                                              | Number and proportion of patients with dementia (%) | Number and proportion of patients without dementia (%) |
|-------------------------------------------------------------|-----------------------------------------------------|--------------------------------------------------------|
| <b>Cardiovascular and cerebrovascular disorders</b>         | 17.6                                                | 17.6                                                   |
| Heart failure                                               | 6.3                                                 | 6.3                                                    |
| Ischemic stroke                                             | 3.0                                                 | 3.0                                                    |
| Atherosclerosis                                             | 1.7                                                 | 1.7                                                    |
| Primary hypertension                                        | 0.9                                                 | 0.9                                                    |
| Myocardial infarction                                       | 0.9                                                 | 0.9                                                    |
| Atrial fibrillation and flutter                             | 0.9                                                 | 0.9                                                    |
| Pulmonary embolism                                          | 0.5                                                 | 0.5                                                    |
| <b>Digestive system disorders</b>                           | 8.8                                                 | 8.8                                                    |
| Gastrointestinal hemorrhage, unspecified                    | 1.5                                                 | 1.5                                                    |
| Paralytic ileus and intestinal obstruction without hernia   | 1.3                                                 | 1.3                                                    |
| Cholelithiasis                                              | 0.9                                                 | 0.9                                                    |
| Other functional intestinal disorders                       | 0.8                                                 | 0.8                                                    |
| Gastritis                                                   | 0.5                                                 | 0.5                                                    |
| Diverticular disease of intestine                           | 0.5                                                 | 0.5                                                    |
| <b>Endocrine, nutritional, and metabolic diseases</b>       | 8.0                                                 | 8.0                                                    |
| Volume depletion                                            | 6.0                                                 | 6.0                                                    |
| Diabetes mellitus Type 2                                    | 1.4                                                 | 1.4                                                    |
| Other disorders of fluid, electrolyte and acid-base balance | 0.6                                                 | 0.6                                                    |
